# Supplementary material for: Ethylene glycol-based solar-thermal fluids dispersed with reduced graphene oxide
Source: Royal Society of Chemistry journal article supplement (doi:10.1039/c8ra09533g), 2019-01-01
Supplement: c8ra09533g1.pdf [file c8ra09533g1.pdf]

**Supplementary Information**

**Ethylene glycol-based solar-thermal fluids dispersed  
with reduced graphene oxide**

Lei Shu, Jingyi Zhang, Benwei Fu, Jiale Xu, Peng Tao\*, Chengyi Song, Wen Shang,  
Jianbo Wu, Tao Deng\*

State Key Laboratory of Metal Matrix Composites, School of Materials Science and  
Engineering, Shanghai Jiao Tong University, Shanghai, 200240, China

Corresponding Email: [taopeng@sjtu.edu.cn](mailto:taopeng@sjtu.edu.cn); [dengtao@sjtu.edu.cn](mailto:dengtao@sjtu.edu.cn)

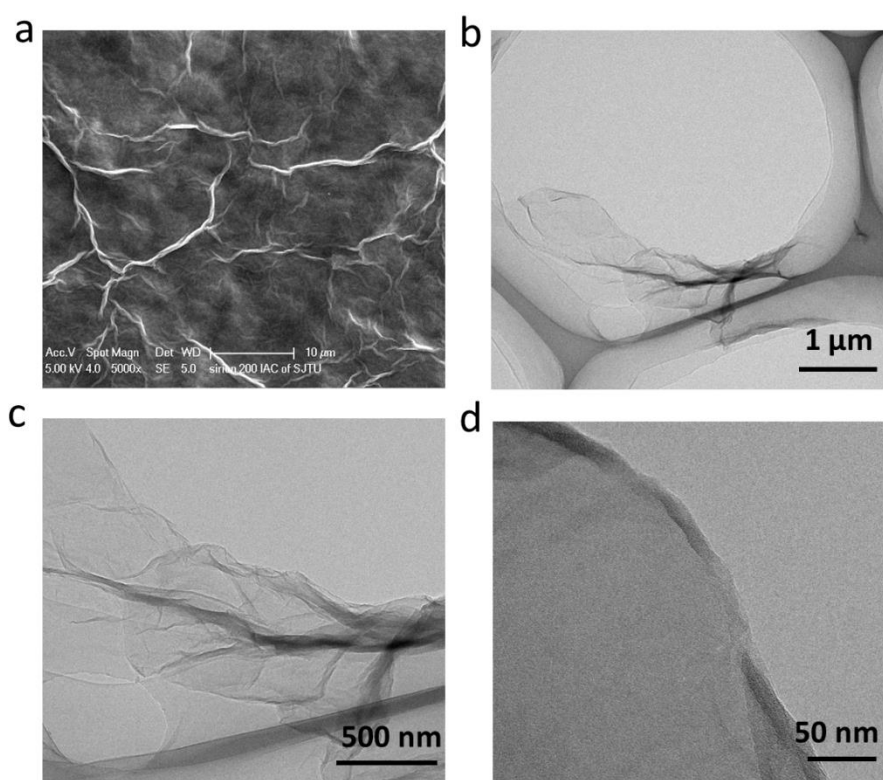

**Fig. S1** (a) SEM image of ethanol-wetted GO; (b-d) TEM images of ethanol-wetted GO under different magnifications.

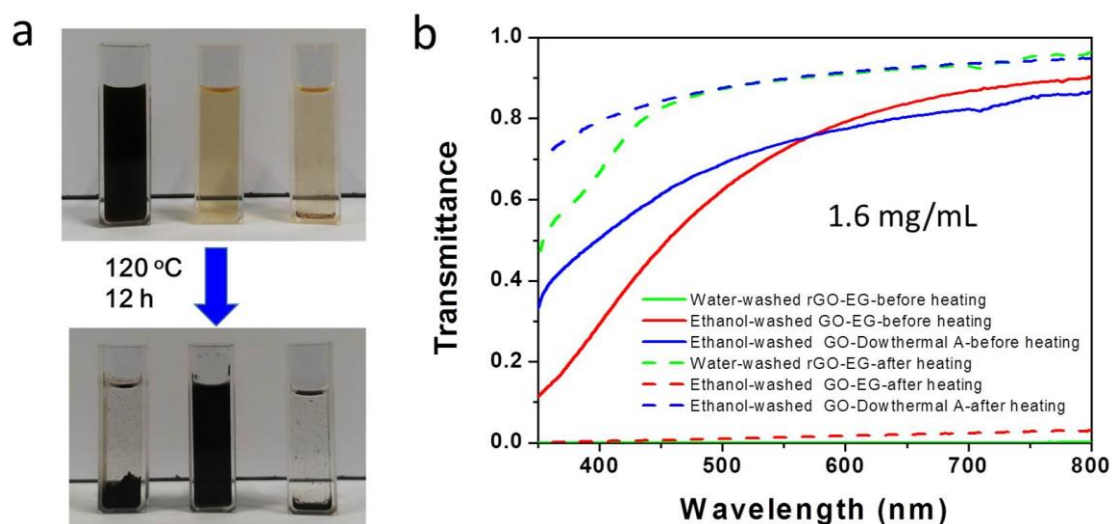

**Fig. S2** (a) Photographs of EG fluids dispersed with 1.6 mg/mL of water washed rGO (left), ethanol-washed GO (middle), and ethanol-washed GO-Dow thermal A oil fluids before (top) and after (bottom) heating at 120 °C for 12 h; (b) Comparison of transmittance spectra of the fluids before and after heating.

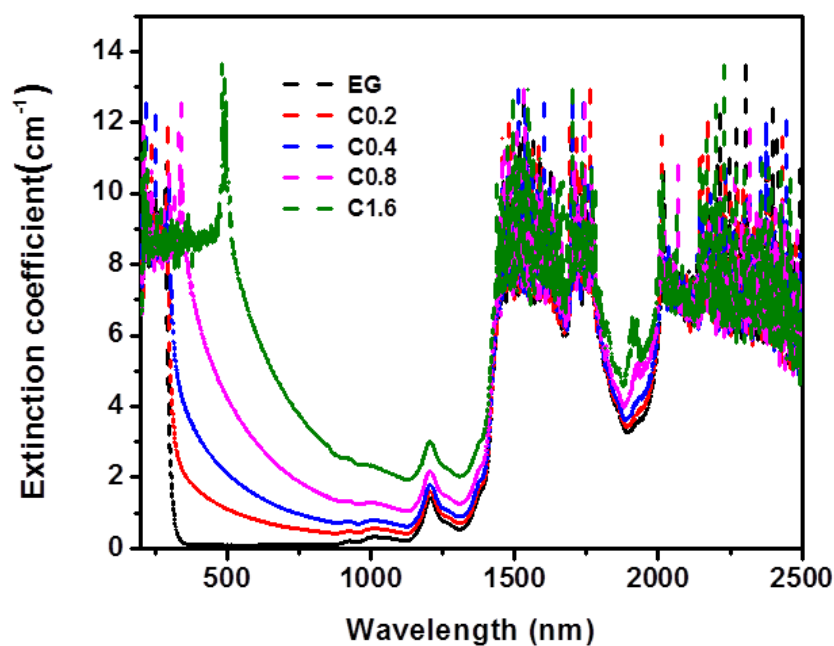

**Fig. S3** Extinction coefficient of EG and rGO-EG fluids with different concentration of rGO (C0.2:0.2 mg/mL; C0.4:0.4 mg/mL; C0.8:0.8 mg/mL; C1.6:1.6 mg/mL).

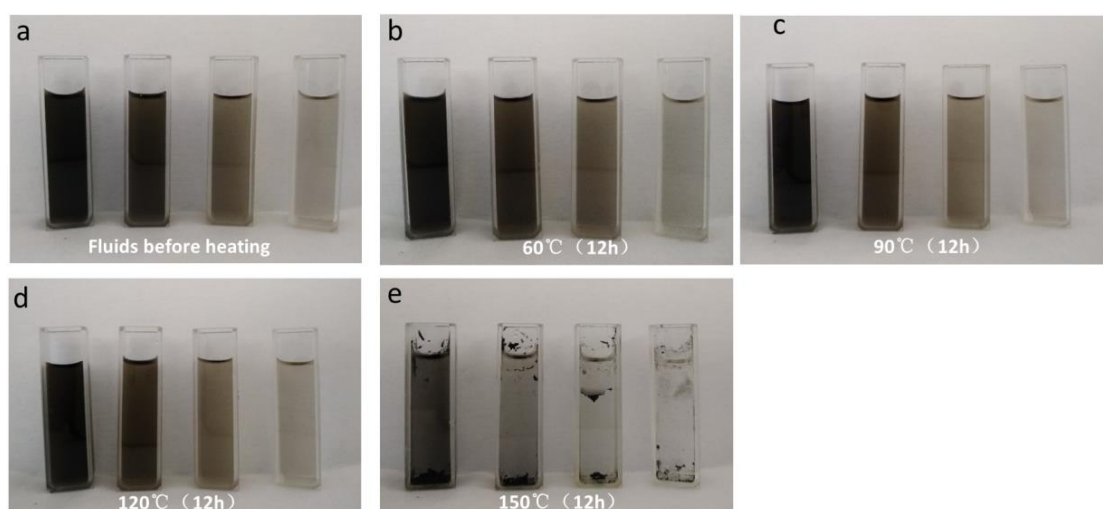

**Fig. S4** (a) Photographs of as-prepared rGO-EG fluids with different loading (from left to right: 1.6 mg/mL, 0.8 mg/ml, 0.4 mg/mL, 0.2 mg/mL); (b) Photographs of rGO-EG fluids after heating at 60 °C for 12 h; (c) Photographs of rGO-EG fluids after heating at 90 °C for 12 h; (d) Photographs of rGO-EG fluids after heating at 120 °C for 12 h; (e) Photographs of rGO-EG fluids after heating at 150 °C for 12 h.

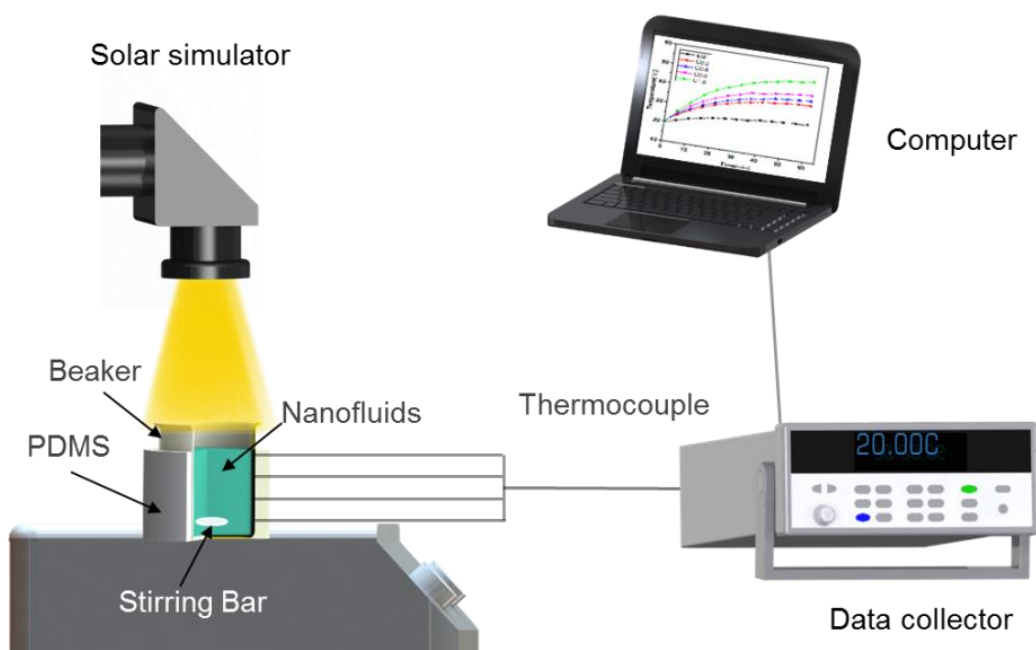

**Fig. S5** Schematic of experimental setup for direct absorption-based solar-thermal energy harvesting

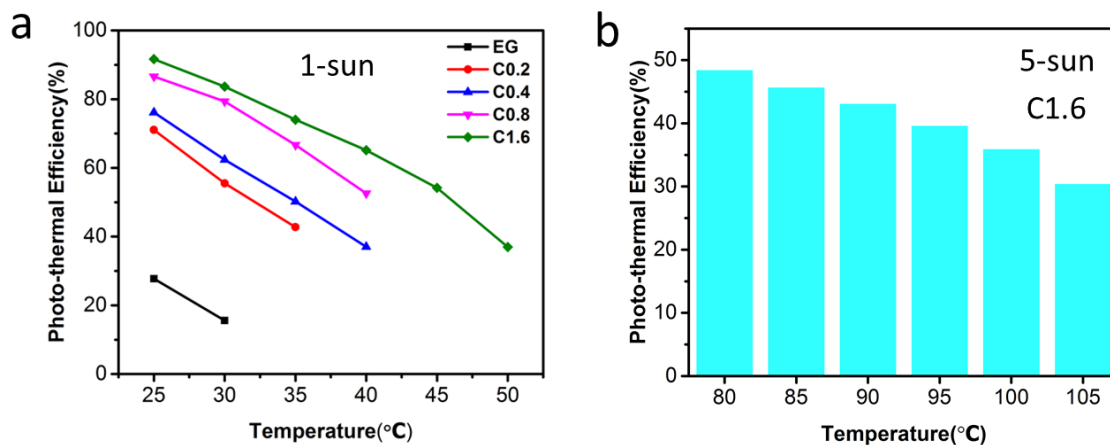

**Fig. S6** (a) Photothermal conversion efficiency of stirred EG and rGO-EG fluids under  $1 \text{ kW/m}^2$  solar irradiation; (b) Photothermal conversion efficiency of stirred rGO-EG fluids ( $1.6 \text{ mg/mL}$ ) under  $5 \text{ kW/m}^2$  solar irradiation.

**Table S1 Specific heat of EG and rGO-EG fluids at different temperatures**

| Specific Heat<br>(J*g <sup>-1</sup> K <sup>-1</sup> )<br>Temperature<br>(°C) | EG   | C0.2 | C0.4 | C0.8 | C1.6 |
|------------------------------------------------------------------------------|------|------|------|------|------|
| 36                                                                           | 2.07 | 2.02 | 1.97 | 1.94 | 1.93 |
| 45                                                                           | 2.16 | 2.15 | 2.01 | 1.99 | 1.96 |
| 55                                                                           | 2.14 | 2.07 | 1.96 | 1.94 | 1.92 |
| 65                                                                           | 2.24 | 2.11 | 2.07 | 2.01 | 1.99 |
| 75                                                                           | 2.53 | 2.42 | 2.37 | 2.36 | 2.31 |

**Table S2 Viscosity of EG and rGO-EG fluids at different temperatures**

| Viscosity<br>(mPa.s)<br>Temperature<br>(°C) | EG    | C0.2  | C0.4  | C0.8  | C1.6  |
|---------------------------------------------|-------|-------|-------|-------|-------|
| 20                                          | 18.63 | 19.28 | 18.60 | 18.78 | 19.82 |
| 25                                          | 15.37 | 15.76 | 15.55 | 15.26 | 16.43 |
| 30                                          | 12.66 | 13.02 | 12.90 | 12.73 | 13.71 |
| 35                                          | 10.24 | 10.75 | 10.95 | 10.45 | 11.41 |
| 40                                          | 8.63  | 8.83  | 8.86  | 8.44  | 9.01  |
| 45                                          | 7.26  | 7.34  | 7.60  | 7.04  | 7.63  |
| 50                                          | 6.29  | 6.39  | 6.47  | 6.08  | 6.58  |
| 55                                          | 5.30  | 5.50  | 5.76  | 5.34  | 5.73  |
| 60                                          | 4.71  | 4.80  | 5.13  | 4.68  | 5.08  |
| 65                                          | 4.14  | 4.35  | 4.36  | 4.08  | 4.51  |
| 70                                          | 3.69  | 3.92  | 3.90  | 3.65  | 4.11  |
| 75                                          | 3.28  | 3.56  | 3.52  | 3.19  | 3.73  |
| 80                                          | 2.99  | 3.22  | 3.12  | 2.82  | 3.42  |

**Table S3 Thermal Conductivity of EG and rGO-EG fluids at room temperature**

| Sample | Average Thermal conductivity(W/m K) | Standard Deviation |
|--------|-------------------------------------|--------------------|
| EG     | 0.2599                              | 0.0058             |
| C0.2   | 0.2612                              | 0.0046             |
| C0.4   | 0.2624                              | 0.0054             |
| C0.8   | 0.2651                              | 0.0046             |
| C1.6   | 0.2673                              | 0.0070             |

**Table S4 Zeta potential of rGO-EG fluids before and after heating**

| Sample                                | Absolute Zeta potential (mV) |                 |                 |         |                    |
|---------------------------------------|------------------------------|-----------------|-----------------|---------|--------------------|
|                                       | 1 <sup>st</sup>              | 2 <sup>nd</sup> | 3 <sup>rd</sup> | Average | Standard Deviation |
| Fluids before heating                 | 32.72                        | 31.04           | 30.51           | 31.42   | 1.15               |
| Fluids after heating<br>(120 °C-12 h) | 25.43                        | 27.08           | 24.6            | 25.70   | 1.26               |
| Fluids after heating<br>(150 °C-12 h) | 14.57                        | 10.87           | 18.85           | 14.76   | 3.99               |
